# Supplementary material for: Characterization of Leptoglossus occidentalis Eggs and Egg Glue
Source: MDPI journal article supplement (doi:10.3390/insects14040396), 2023-04-19
Supplement: s1 [file s1]

## SUPPORTING INFORMATION

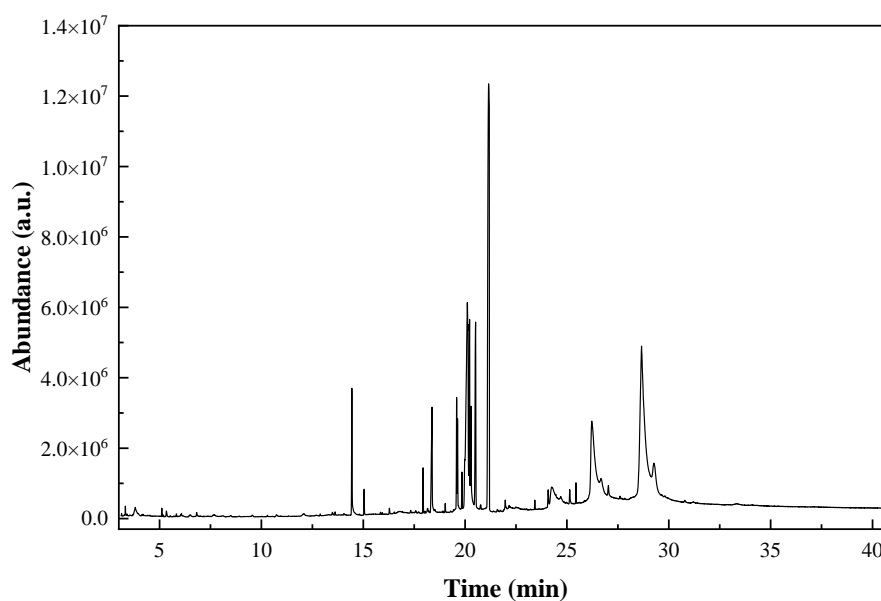

**Figure S1.** GC–MS chromatogram of *L. occidentalis* eggs.

**Table S1.** Main chemical species identified in *L. occidentalis* eggs by GC–MS.

| Retention time (min) | Area (%) | Assignment                                         | Qual |
|----------------------|----------|----------------------------------------------------|------|
| 14.4471              | 3.7856   | Dibutyl itaconate                                  | 94   |
| 17.9371              | 1.0225   | Hexadecanoic acid, methyl ester                    | 99   |
| 18.3763              | 4.9311   | n-Hexadecanoic acid                                | 99   |
| 19.5871              | 3.0710   | 9,12-Octadecadienoic acid, methyl ester            | 99   |
| 19.6346              | 2.7232   | 9-Octadecenoic acid, methyl ester                  | 99   |
| 19.8483              | 1.1173   | Methyl stearate                                    | 99   |
| 20.1094              | 22.5155  | 9,12-Octadecadienoic acid                          | 99   |
| 20.2222              | 5.9806   | 1-Propene-1,2,3-tricarboxylic acid, tributyl ester | 95   |
| 20.2934              | 4.9070   | Octadecanoic acid                                  | 99   |
| 20.513               | 7.1539   | Butyl citrate                                      | 91   |
| 21.1599              | 33.2528  | Tributyl acetylcitrate                             | 87   |
| 21.979               | 1.4978   | 9-Octadecenamide                                   | 94   |
| 22.4954              | 0.3430   | Heptaethylene glycol monododecyl ether             | 58   |
| 25.1366              | 0.7980   | 13-Docosenamide                                    | 94   |
| 25.4453              | 0.6382   | Squalene                                           | 99   |

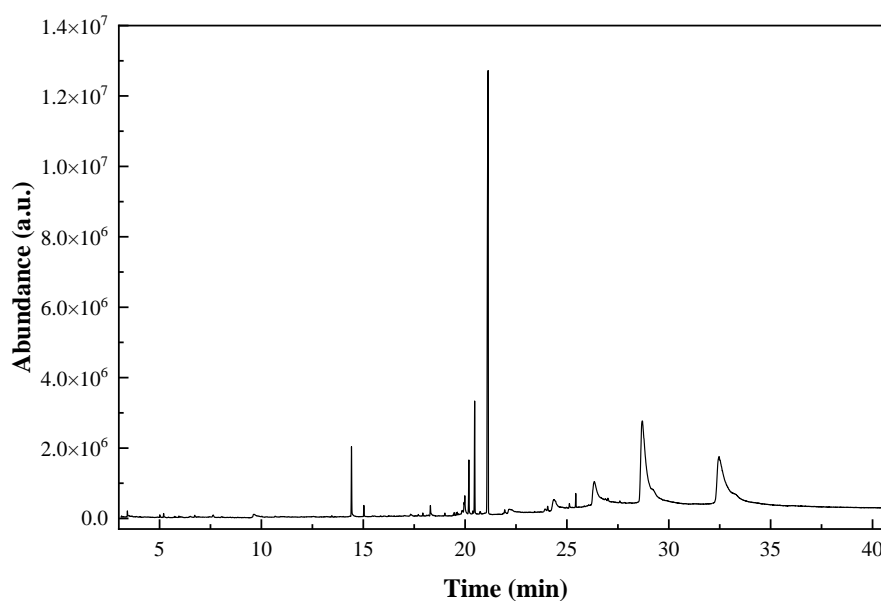

**Figure S2.** GC–MS chromatogram of *L. occidentalis* glue.

**Table S2.** Main chemical species identified in *L. occidentalis* egg glue by GC-MS.

| Retention time (min) | Area (%) | Assignment                                         | Qual |
|----------------------|----------|----------------------------------------------------|------|
| 5.2058               | 0.3082   | 1,2-Cyclopentanedione                              | 90   |
| 5.9537               | 0.0918   | Hexanoic acid                                      | 47   |
| 9.6395               | 1.5604   | Dianhydromannitol                                  | 97   |
| 14.4293              | 4.7458   | Dibutyl itaconate                                  | 94   |
| 16.2455              | 0.1078   | Tetradecanoic acid                                 | 94   |
| 17.9311              | 0.2009   | Hexadecanoic acid, methyl ester                    | 99   |
| 18.1092              | 0.0870   | Ethyl 9-hexadecenoate                              | 41   |
| 18.2991              | 1.1017   | n-Hexadecanoic acid                                | 99   |
| 19.5693              | 0.1872   | 9,12-Octadecadienoic acid-, methyl ester           | 99   |
| 19.6167              | 0.2230   | 9-Octadecenoic acid, methyl ester                  | 98   |
| 19.8719              | 1.0999   | Adipic acid, 2-ethylhexyl isobutyl ester           | 64   |
| 19.9907              | 3.1248   | Oleic Acid                                         | 99   |
| 20.1865              | 3.8039   | 1-Propene-1,2,3-tricarboxylic acid, tributyl ester | 95   |
| 20.3824              | 0.3458   | Hexadecanamide                                     | 55   |
| 20.4714              | 7.3203   | Butyl citrate                                      | 91   |
| 20.7504              | 0.3095   | Tributyl acetylcitrate                             | 30   |
| 21.1302              | 54.1289  | Butyl citrate                                      | 72   |
| 21.9493              | 1.8635   | 9-Octadecenamide                                   | 93   |
| 24.3650              | 6.5063   | Heptaethylene glycol                               | 81   |
| 25.1188              | 0.8805   | 13-Docosenamide                                    | 64   |
| 25.4393              | 1.1882   | Squalene                                           | 99   |
